# Supplementary material for: Analysis of the Neutralizing Activity of Antibodies Targeting Open or Closed SARS-CoV-2 Spike Protein Conformations
Source: MDPI journal article supplement (doi:10.3390/ijms23042078), 2022-02-14
Supplement: s1 [file s1]

## Supplementary Material

Analysis of the neutralizing activity of antibodies  
targeting open or closed SARS-CoV-2 spike protein conformations

Gabriel Cia, Fabrizio Pucci, Marianne Rومان

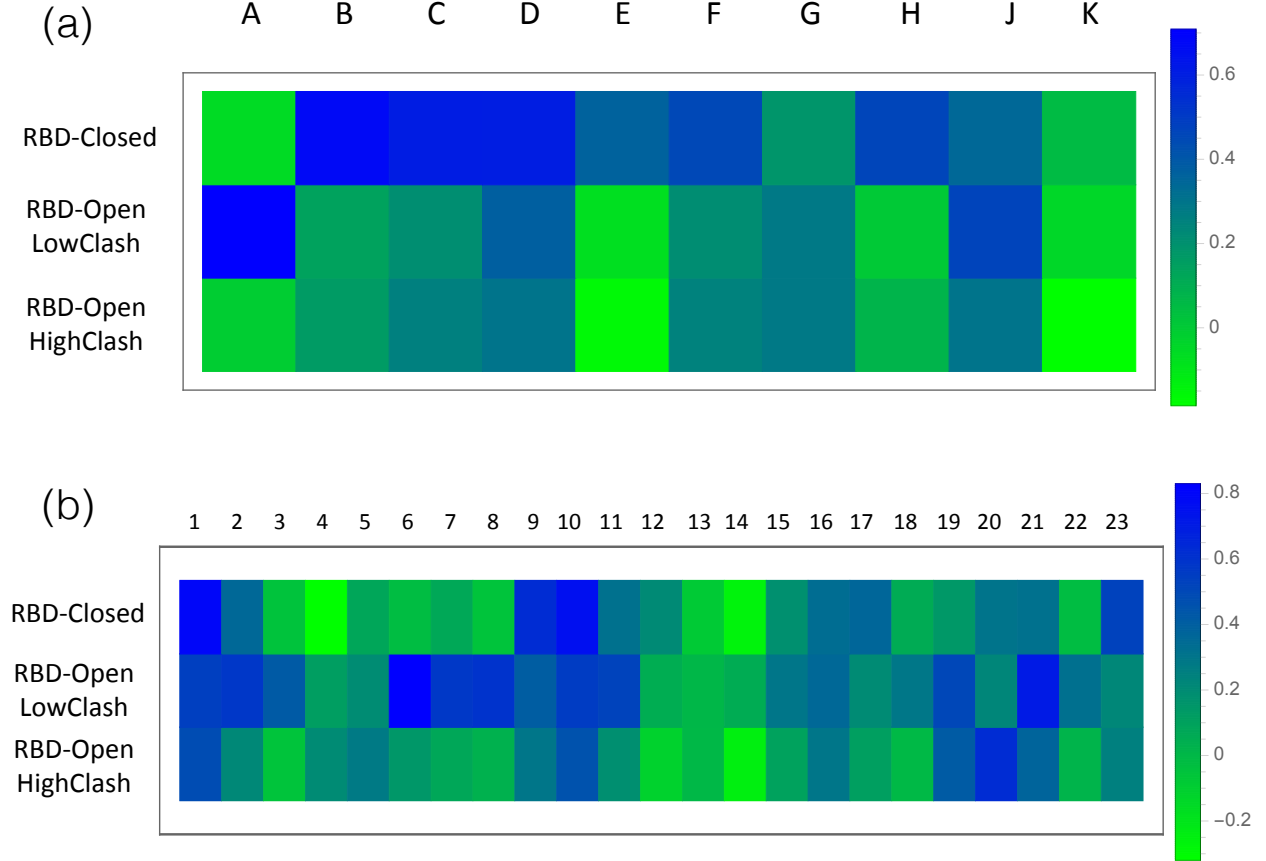

Figure S1. Correlation coefficients between the predicted change in nAb-spike protein binding affinity  $\Delta\Delta G_b$  upon mutations (see section 2.4 of the main text) averaged over the nAbs contained in the three RBD-targeting classes (RBD-Closed, RBD-Open-LowClash and RBD-Open-HighClash) and the escape fraction of a set of variants measured from the neutralizing activity of plasma from: (a) 10 SARS-CoV-2 infected patients [A-K] and (b) 23 vaccinated individuals [1-23] (see section 2.5). The mutations analyzed are the set of 20 most frequently observed RBD variants in circulating viral strains (see section 2.4). The color scales are indicated on the right.

| <b>Key spike protein residues involved in nAb binding</b> |                   |                    |         |
|-----------------------------------------------------------|-------------------|--------------------|---------|
| RBD-Closed                                                | RBD-Open-LowClash | RBD-Open-HighClash | NTD     |
| 449 TYR                                                   | 417 LYS           | 369 TYR            | 144 TYR |
| 452 LEU                                                   | 421 TYR           | 372 ALA            | 147 LYS |
| 456 PHE                                                   | 455 LEU           | 374 PHE            | 154 GLU |
| 484 GLU                                                   | 456 PHE           | 377 PHE            | 156 GLU |
| 486 PHE                                                   | 486 PHE           | 378 LYS            | 158 ARG |
| 489 TYR                                                   | 489 TYR           | 380 TYR            | 246 ARG |
| 490 PHE                                                   | 505 TYR           | 384 PRO            | 248 TYR |

Table S1. List of the key spike protein residues involved in nAb binding. Only hydrophobic, ionic, cation- $\pi$ , and aromatic-aromatic interactions were considered. The values were calculated by running the Protein Interactions Calculator (PIC) webserver on each nAb-RBD or nAb-NTD structure with default parameter values, and selecting the residues that appear most often in interaction with nAb residues.

| <b>Key spike protein residues involved in ACE2 binding</b> |
|------------------------------------------------------------|
| 403 ARG                                                    |
| 417 LYS                                                    |
| 484 GLU                                                    |
| 486 PHE                                                    |
| 489 TYR                                                    |

Table S2. Key spike protein residues involved in ACE2 binding. Only hydrophobic, ionic, cation- $\pi$ , and aromatic-aromatic interactions were considered. The values were calculated by running the Protein Interactions Calculator (PIC) webserver on the PDB structure 6M0J with default parameter values.

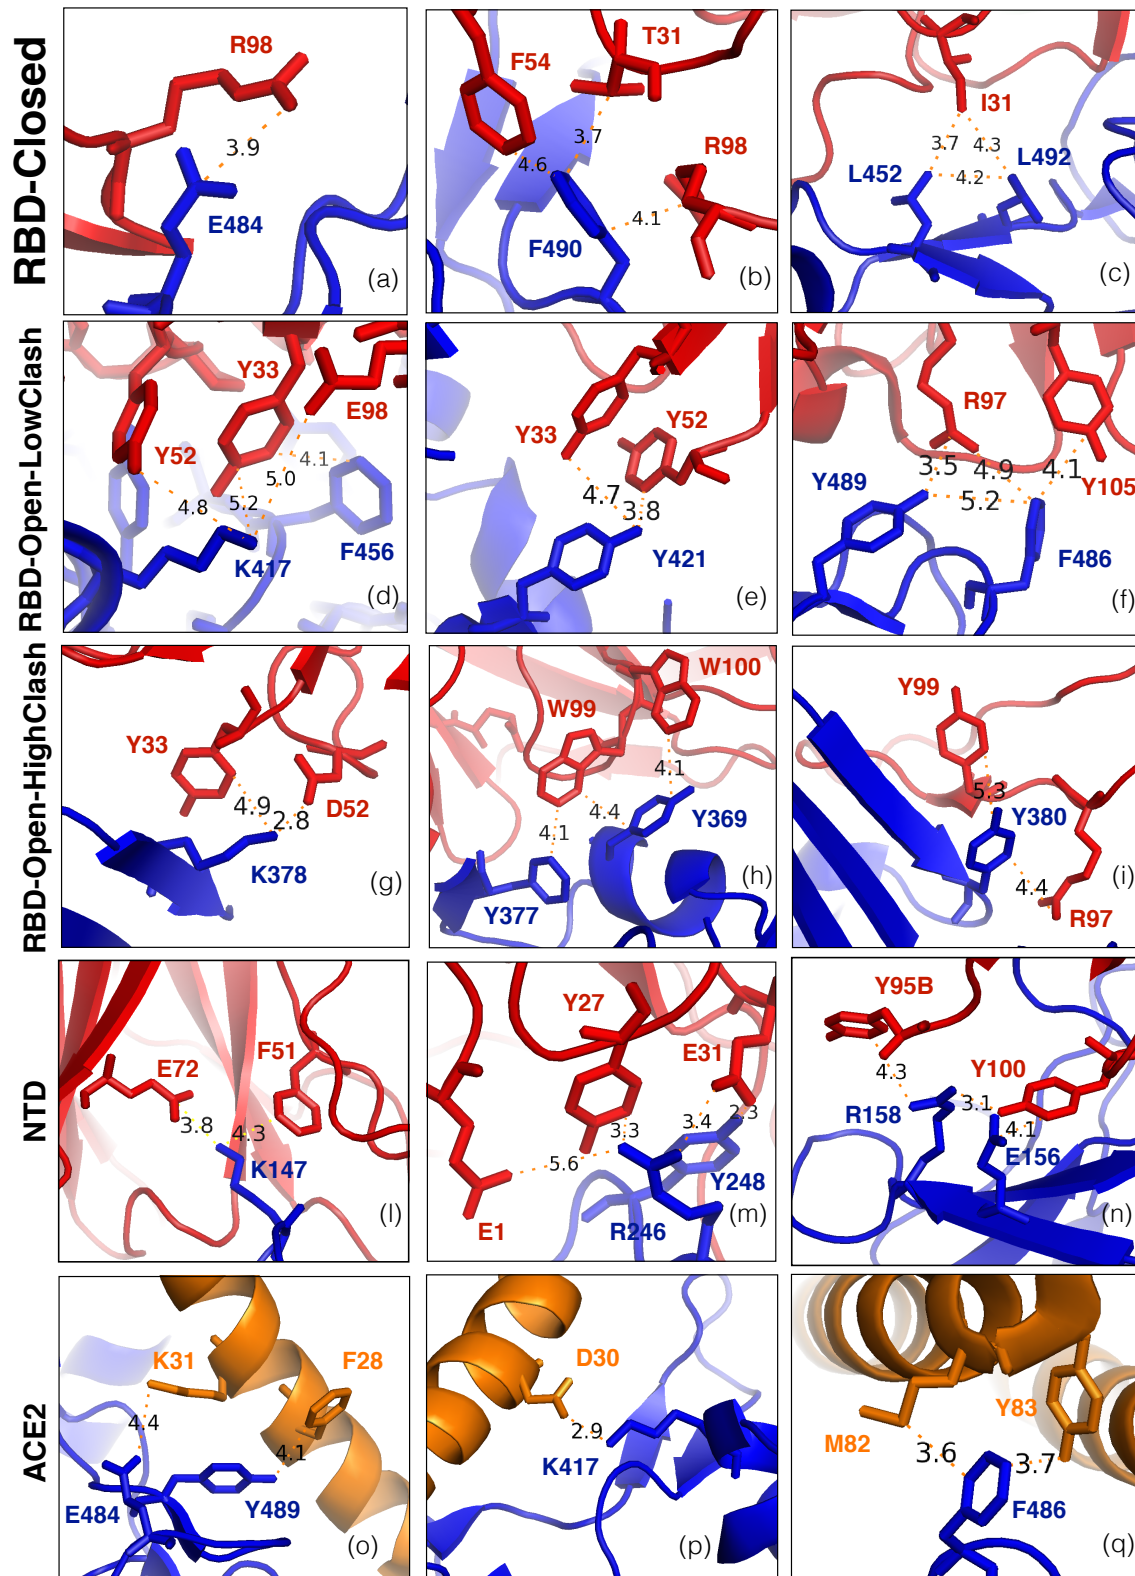

Figure S2. Representation of key spike protein residues and their interactions. (a-n) Residues that are most often involved in spike protein-nAb binding interactions for the four classes of nAbs. The spike protein structure is represented in blue and the nAbs in red. The PDB structures used are (a-c): 7mf1; (d-f) 7km1; (g-h) 7m7b; (i) 7jmw; (l-m) 7c2l; (n) 72le. (o-q) Spike protein-ACE2 binding interactions from PDB structure 6m0j, with spike protein residues depicted in blue and ACE2 residues in orange. Interatomic distances are indicated in Å.
